# Supplementary material
Source: Springer Nature journal article supplement (https://www.springermedizin.de/resource/supplementary/12931_2011_1124_MOESM1_ESM.pdf/9425702)

Serum KL-6 level (U/ml)

$p=0.207$

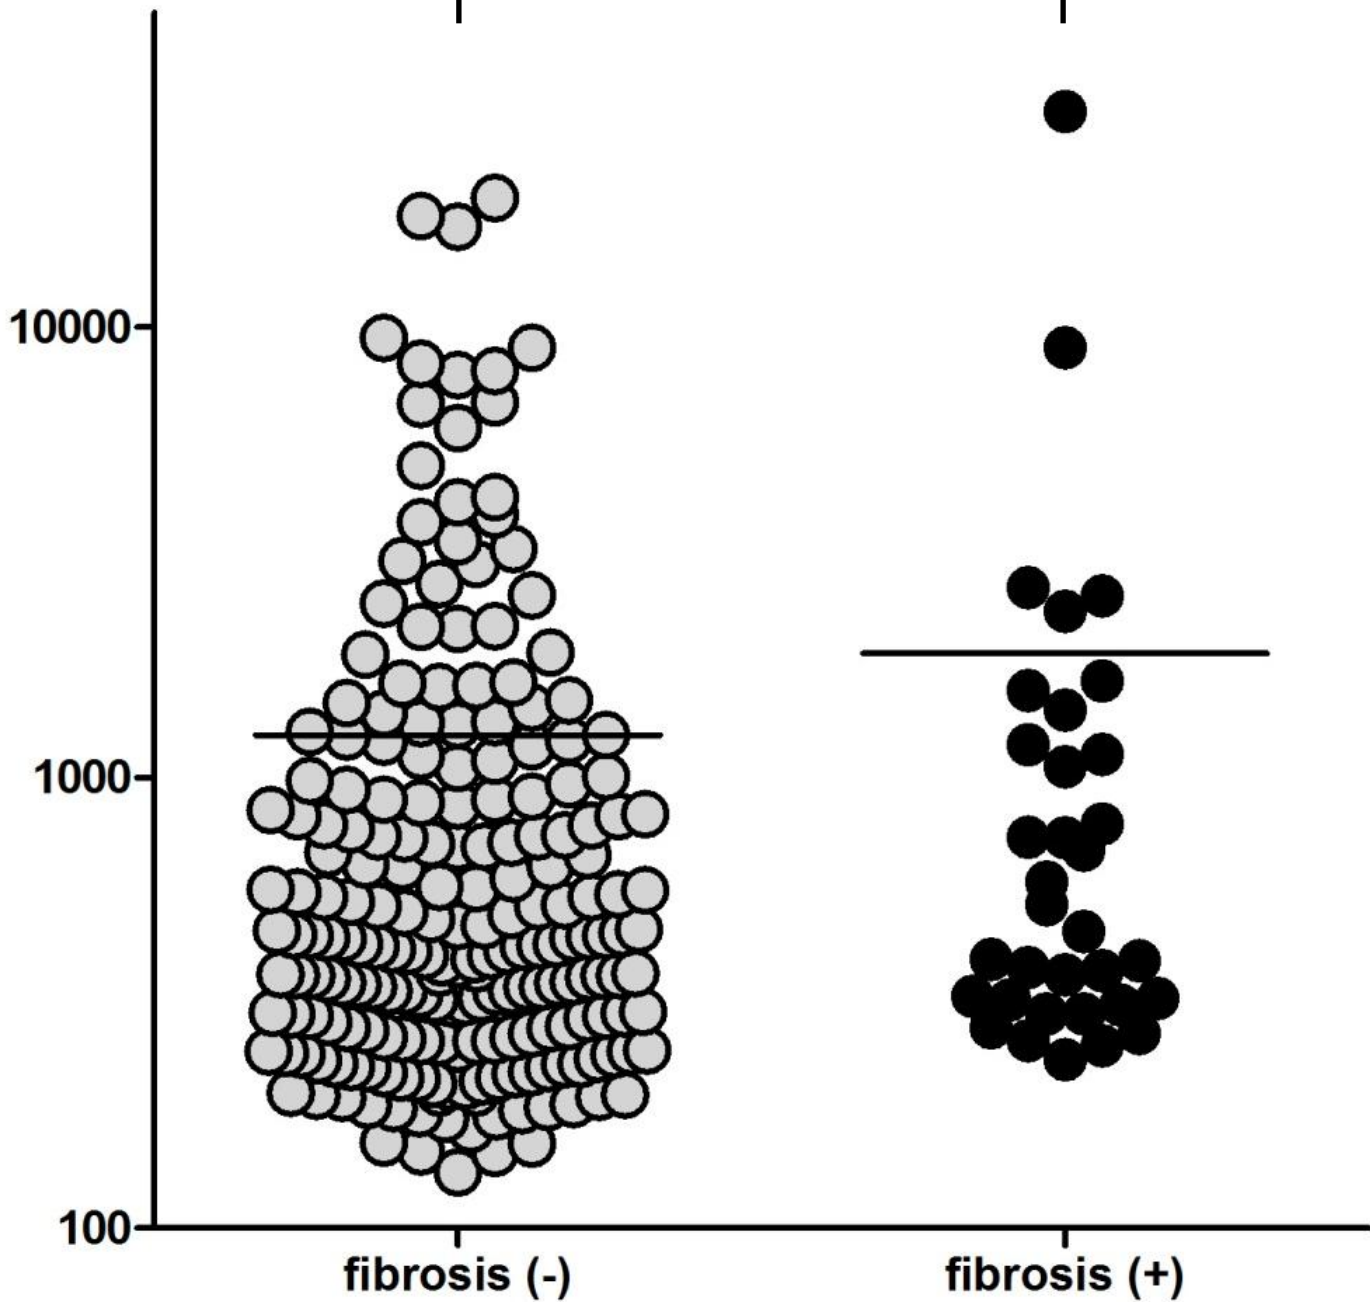

Supplement: MOESM1 [file 9425702]
